# Supplementary material
Source: HighWire-hosted journal article supplement (http://www.cmaj.ca/highwire/filestream/59911/field_highwire_adjunct_files/1/150674-res-2-at.pdf)

**Appendix 2 (as supplied by the authors):** Mean quarterly number of cataract operations performed by recent graduates during their initial career stage, 2007–2013

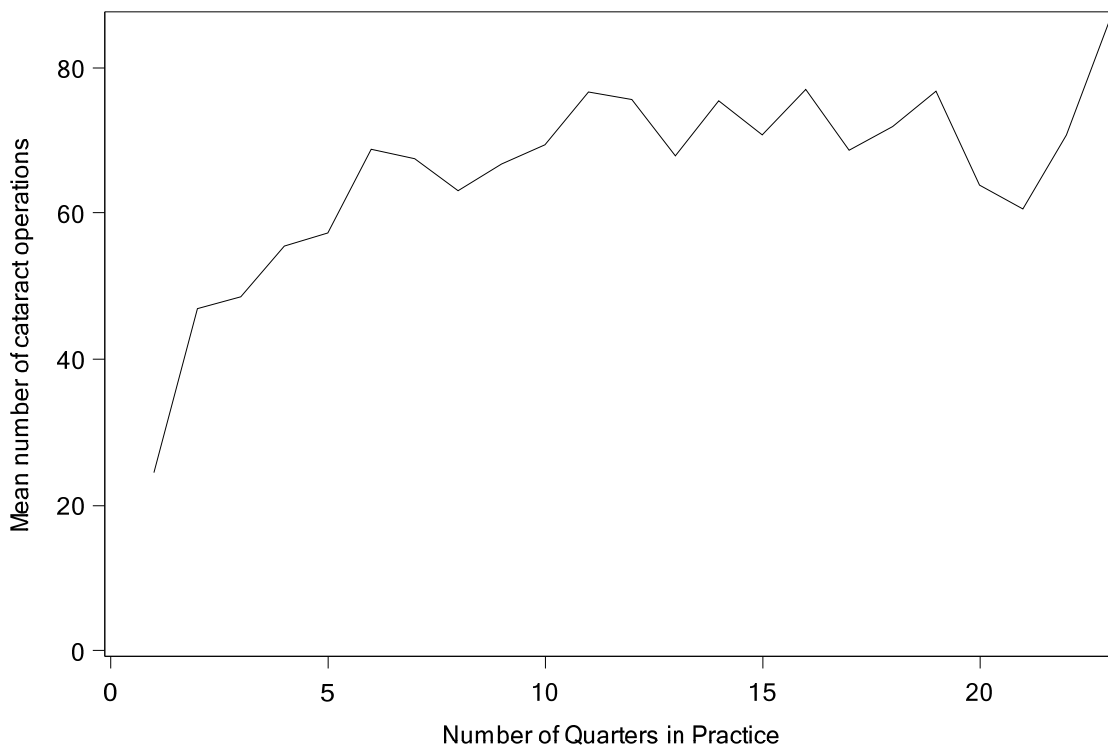

Supplement: 150674-res-2-at.pdf [file 150674-res-2-at.pdf]
